# Supplementary material for: Stable and unstable fall motions of plate-like ice crystal analogues
Source: Copernicus journal article supplement (doi:10.5194/egusphere-2024-319), 2024-02-26

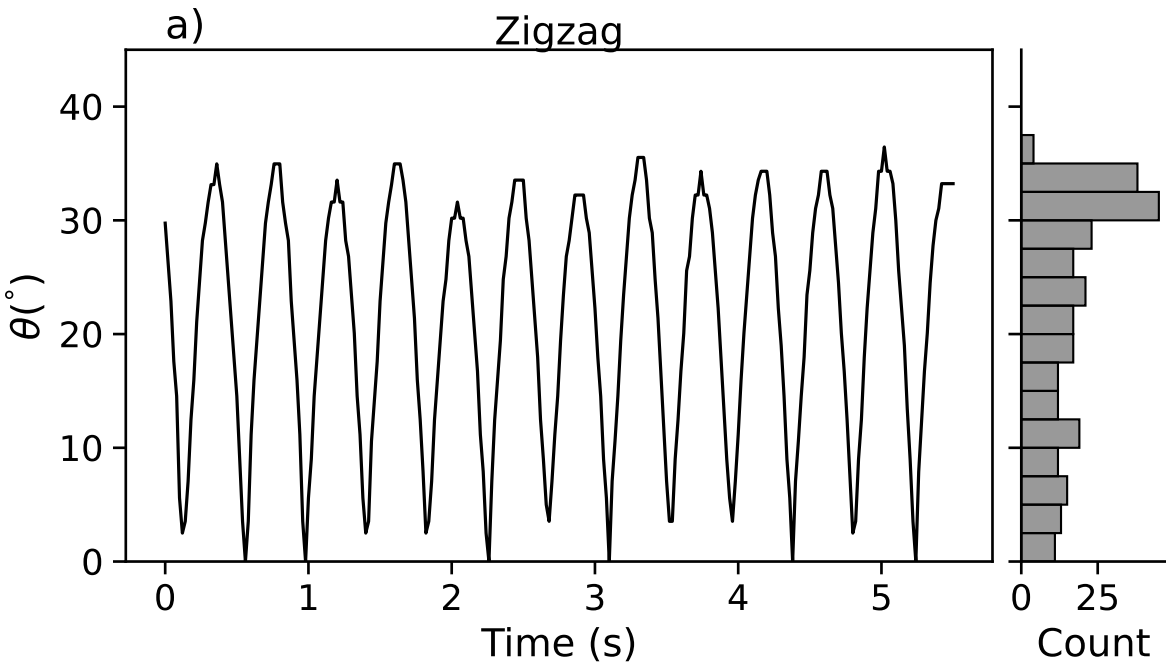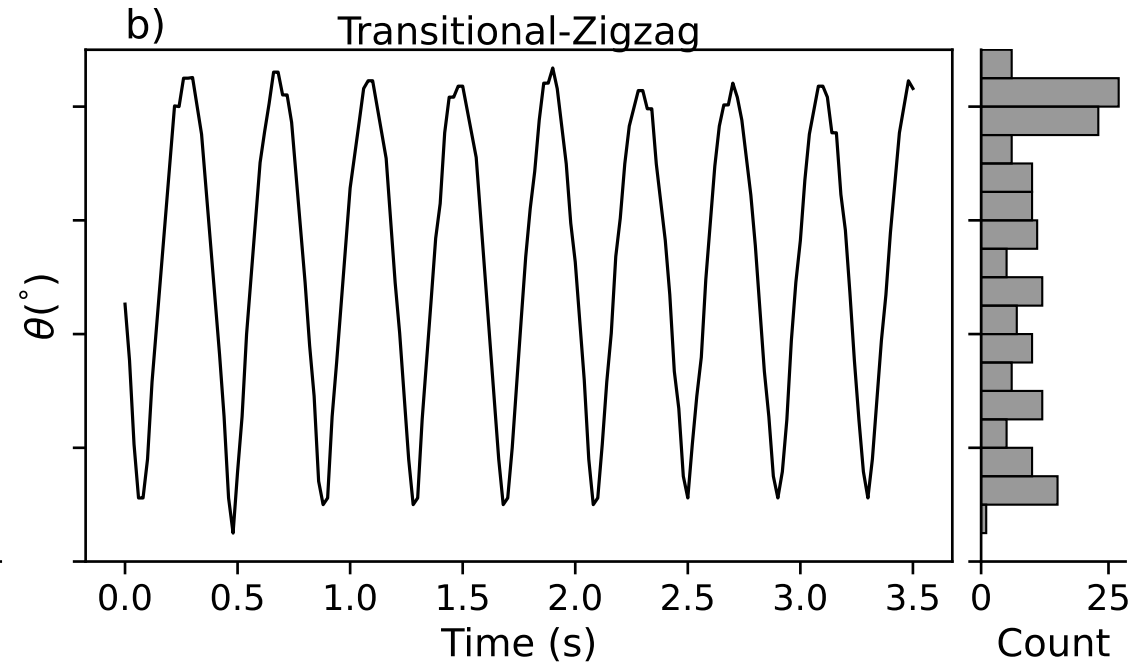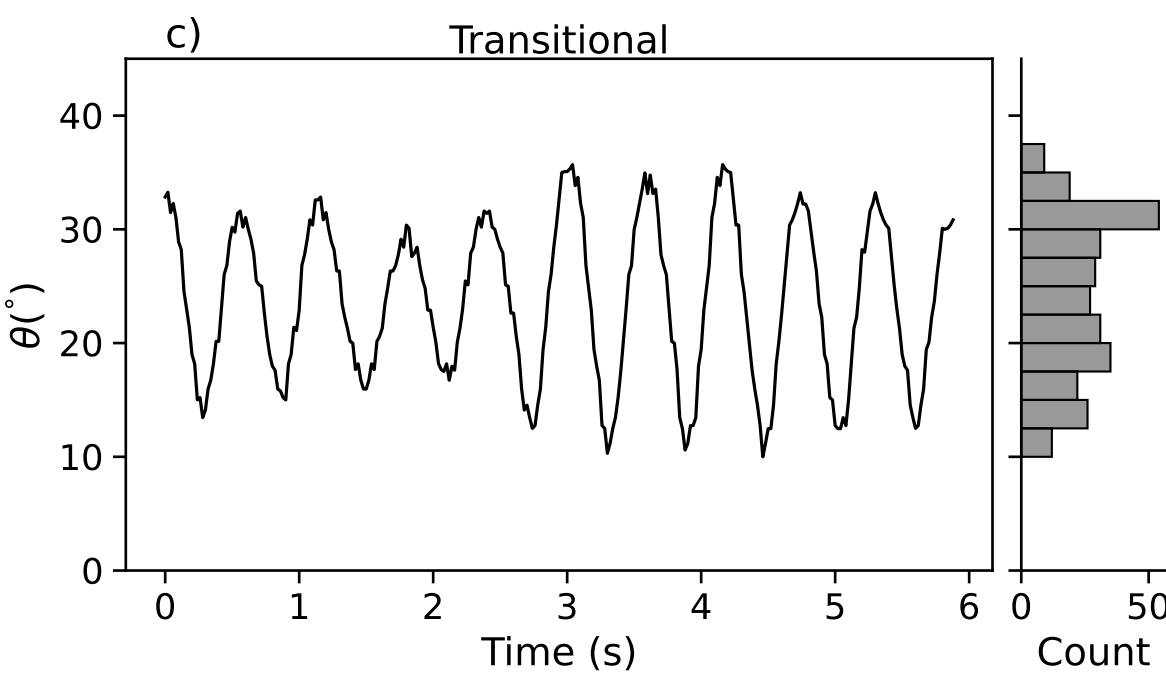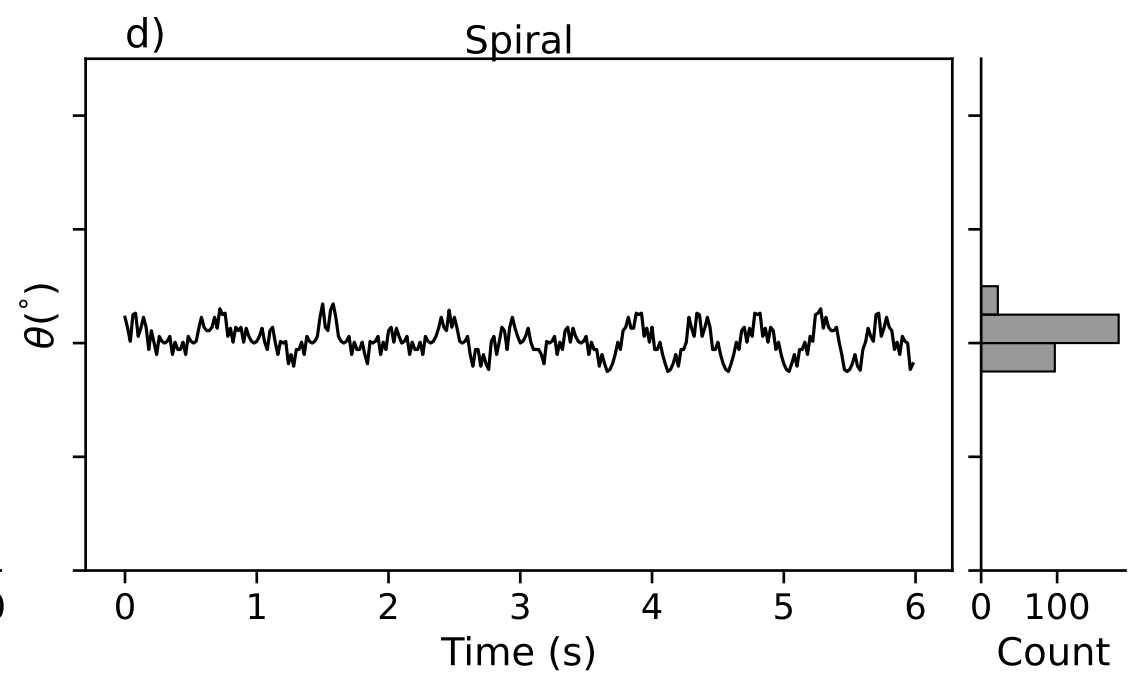

Supplement: Supplementary file [file egusphere-2024-319-AC1-supplement.pdf]
